# Supplementary material for: Nasopharyngeal carcinoma cells promote regulatory T cell development and suppressive activity via CD70-CD27 interaction
Source: PubMed Central journal article supplement (PMC10079957; doi:10.1038/s41467-023-37614-6), 2023-04-06
Supplement: 41467_2023_37614_MOESM1_ESM.pdf [file 41467_2023_37614_MOESM1_ESM.pdf]

## Supplementary Information

### Nasopharyngeal carcinoma cells promote regulatory T cell development and suppressive activity via CD70-CD27 interaction

Lanqi Gong<sup>1,2\*</sup>, Jie Luo<sup>1\*</sup>, Yu Zhang<sup>3,4,5\*</sup>, Yuma Yang<sup>1</sup>, Shanshan Li<sup>2</sup>, Xiaona Fang<sup>1</sup>, Baifeng Zhang<sup>1</sup>, Jiao Huang<sup>1</sup>, Larry Ka-Yue Chow<sup>1</sup>, Dittman Chung<sup>1</sup>, Jinlin Huang<sup>1</sup>, Cuicui Huang<sup>1,2</sup>, Qin Liu<sup>1,2</sup>, Lu Bai<sup>1,2</sup>, Yuen Chak Tiu<sup>1</sup>, Pingan Wu<sup>6</sup>, Yan Wang<sup>7</sup>, George Sai-Wah Tsao<sup>8</sup>, Dora Lai-wan Kwong<sup>1,2</sup>, Anne Wing-Mui Lee<sup>1,2,9</sup>, Wei Dai<sup>1,2</sup>, Xin-Yuan Guan<sup>1,2,4,5,9#</sup>

<sup>1</sup>Department of Clinical Oncology, Li Ka Shing Faculty of Medicine, The University of Hong Kong, Hong Kong, China. <sup>2</sup>Department of Clinical Oncology, The University of Hong Kong-Shenzhen Hospital, Shenzhen, China. <sup>3</sup>Department of Pediatric Oncology, Sun Yat-sen University Cancer Center, Guangzhou, China. <sup>4</sup>State Key Laboratory of Oncology in South China, Guangdong Key Laboratory of Nasopharyngeal Carcinoma Diagnosis and Therapy, Sun Yat-sen University Cancer Center, Guangzhou, China. <sup>5</sup>Collaborative Innovation Center for Cancer Medicine, Sun Yat-sen University Cancer Center, Guangzhou, China. <sup>6</sup>Department of Surgery, The University of Hong Kong-Shenzhen Hospital, Shenzhen, China. <sup>7</sup>Department of Pathology, The University of Hong Kong-Shenzhen Hospital, Shenzhen, China. <sup>8</sup>School of Biomedical Sciences, Li Ka Shing Faculty of Medicine, The University of Hong Kong, Hong Kong, China. <sup>9</sup>Advanced Energy Science and Technology Guangdong Laboratory, Huizhou, China.

\*These authors contributed equally

**#Correspondence:** Xin-Yuan Guan, Department of Clinical Oncology, Li Ka Shing Faculty of Medicine, The University of Hong Kong, Laboratory Block L10-56, 21 Sassoon Road, Hong Kong, China. Tel: 852-3917-9782; E-mail: xyguan@hku.hk

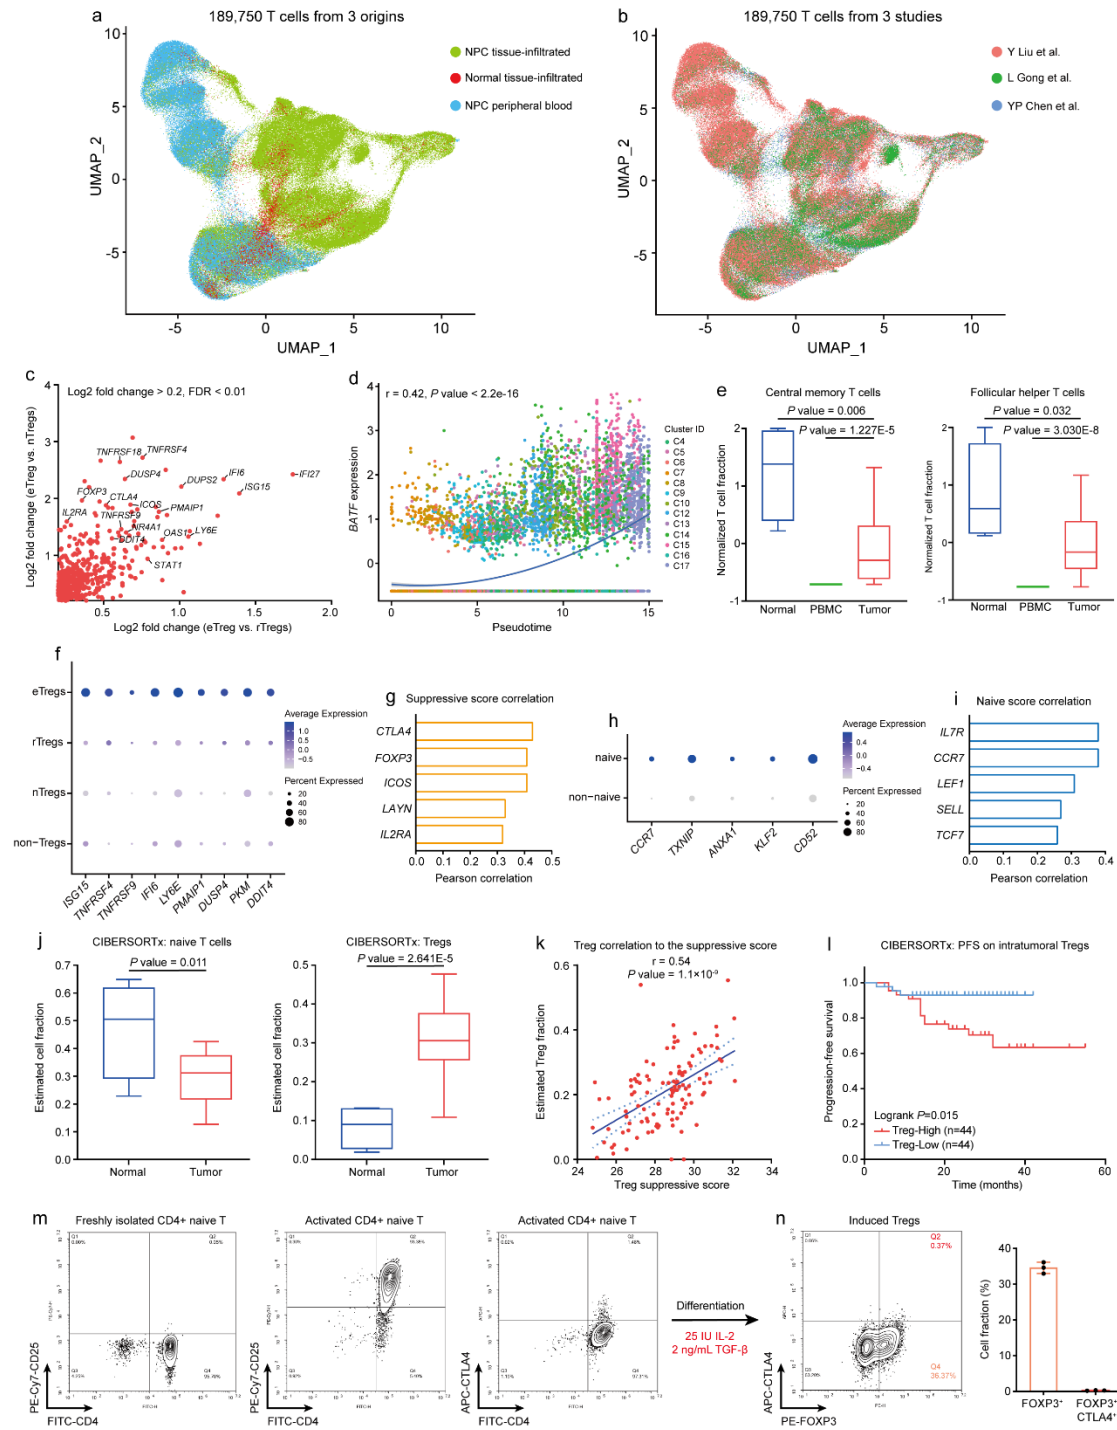

## Supplementary Figure 1 The NPC microenvironment harbors an enriched and activated Treg population.

**a** The UMAP plot of 189,750 T cells from 3 sample origins. **b** The UMAP plot of 189,750 T cells from 3 single-cell NPC cohorts. **c** The differentially expressed genes between eTregs and nTregs/rTregs, determined by the MAST analysis. **d** The change of *BATF* expression through the pseudotime developmental process from CD4<sup>+</sup> naïve T cells to T<sub>FH</sub> cells, modeled by two-sided polynomial regression analysis with the 95% confidence band. **e** The normalized fractions of CD4<sup>+</sup> central memory T cells and

CD4<sup>+</sup> follicular helper T cells in NPC tissues (n=36) versus in NPC peripheral blood (n=10) and INP tissues (n=4) (two-sided unpaired t test). **f** The 9-gene signature used to construct Treg suppressive module and significantly enriched in the eTreg population. **g** The Pearson correlation (two-sided) between the Treg suppressive score and Treg-specific signatures in the NPC scRNA-seq cohort. **h** The 5-gene signature used to construct T cell naivness module and significantly associated with naïve T cells. **i** The Pearson correlation (two-sided) between the T cell naïve score and naïve signatures in the NPC scRNA-seq cohort. **j** The estimated fraction of naïve T cells and Tregs by CIBERSORTx deconvolution of NPC bulk RNA-seq cohort GSE68799 (tumor n=42 and normal n=3, two-sided unpaired t test). **k** Pearson correlation (two-sided) between the Treg fraction estimated by CIBERSORTx and Treg suppressive score computed by the Treg linear model (GSE102349, n=112). **l** The progression-free survival for NPC patients from GSE102349, stratified by the estimated Treg fraction (high n=44, low n=44, two-sided log-rank test). **m** Immunophenotyping of freshly isolated (left panel) and TCR-activated (middle and right panels) CD4<sup>+</sup> naïve T cells by CD4, CD25 and CTLA4 staining. **n** Left, immunophenotyping of CD4<sup>+</sup> naïve T cells after 3-day induced Treg differentiation without tumor cell co-culture. Right, the fraction of FOXP3<sup>+</sup> induced Tregs and FOXP3<sup>+</sup>/CTLA4<sup>+</sup> activated Tregs (n=3). The n number represents n biologically independent samples/experiments in each group. The data are presented as the mean  $\pm$  SD (bar plots), median  $\pm$  IQR (whiskers = 1.5 $\times$ IQR, box & whiskers plots) and KDE (violin plots).

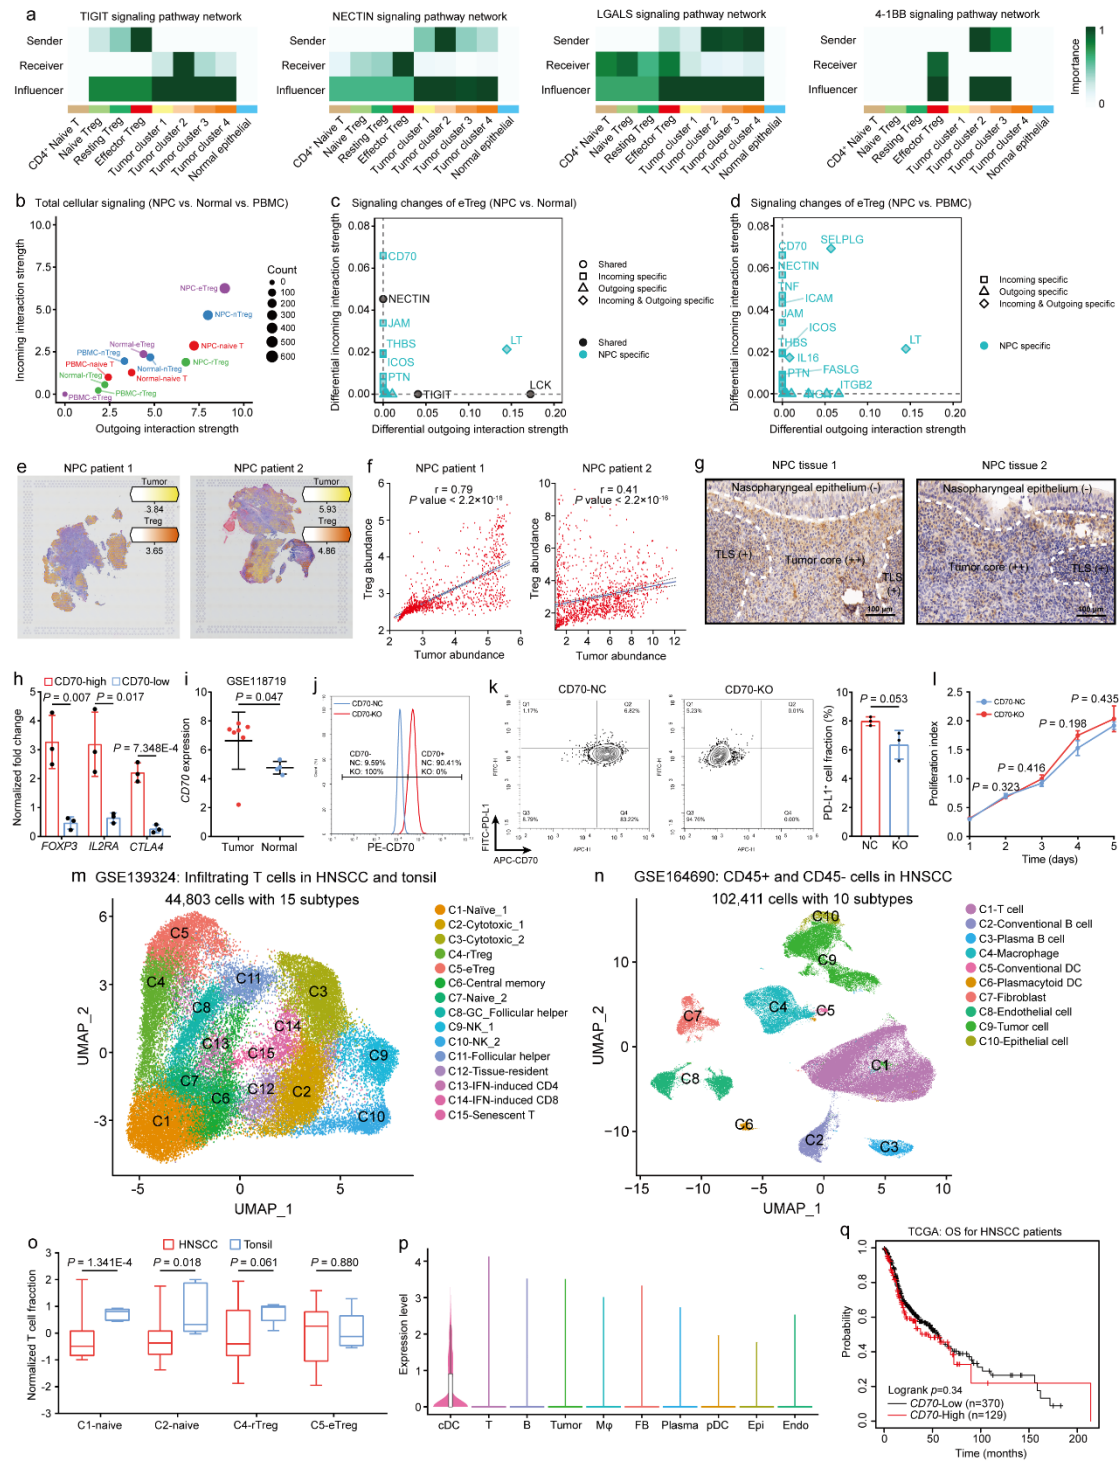

## Supplementary Figure 2 CD70-CD27 interaction plays an NPC-specific role in Treg regulation.

**a** Other enriched cellular communication between NPC and CD4<sup>+</sup> naïve T cells/Tregs.  
**b** Total cellular signaling strength in CD4<sup>+</sup> T cells and Treg subtypes from the NPC, INP and NPC peripheral blood samples.  
**c, d** The differentially expressed cell-cell communications between NPC-infiltrated eTregs and INP-infiltrated eTregs (**c**) and peripheral eTregs (**d**).  
**e** Spatial co-localization of NPC cells and Tregs in primary NPC

tissues, estimated by cell2location. **f** Spearman correlation (two-sided) between NPC cells and Tregs. **g** IHC staining revealed CD70 expression in the tertiary lymphoid structure, tumor core, and normal epithelium. **h** The 18s-normalized mRNA fold changes of Treg markers in CD70-high and CD70-low NPC patients (n=3, two-sided unpaired t test). **i** Normalized CD70 expression in GSE118719. (tumor n=7, normal n=3) (two-sided unpaired t test). **j** The fraction of CD70+ cells after CD70-KO in C666 cells. **k** The fraction of CD70+ and PD-L1+ cells in CD70-NC and CD70-KO C666 cells (n=3, two-sided unpaired t test). **l** The in vitro proliferation of CD70-NC and CD70-KO C666 cells (n=3, two-sided unpaired t test). **m** The UMAP plot of 44,803 T cells with 15 subtypes identified from HNSCC and normal tonsil scRNA-seq samples (GSE139324). **n** The UMAP plot of 102,411 cells with 10 major cell lineages identified from CD45+ and CD45- HNSCC samples (GSE164690). **o** The normalized fractions of C1-naïve T cells, C2-naïve T cells, C4-rTregs and C5-eTregs in HNSCC tissues (n=26) and normal tonsil tissues (n=5) from GSE139324 (two-sided unpaired t test). **p** Single-cell expression of CD70 across major cell lineages in GSE164690. **q** The progression-free survival for HNSCC patients from TCGA cohort, stratified by the CD70 expression (high n=129, low n=370, two-sided log-rank test). The n number represents n biologically independent samples/experiments in each group. The data are presented as the mean  $\pm$  SD (bar plots), median  $\pm$  IQR (whiskers = 1.5 $\times$ IQR, box & whiskers plots) and KDE (violin plots).

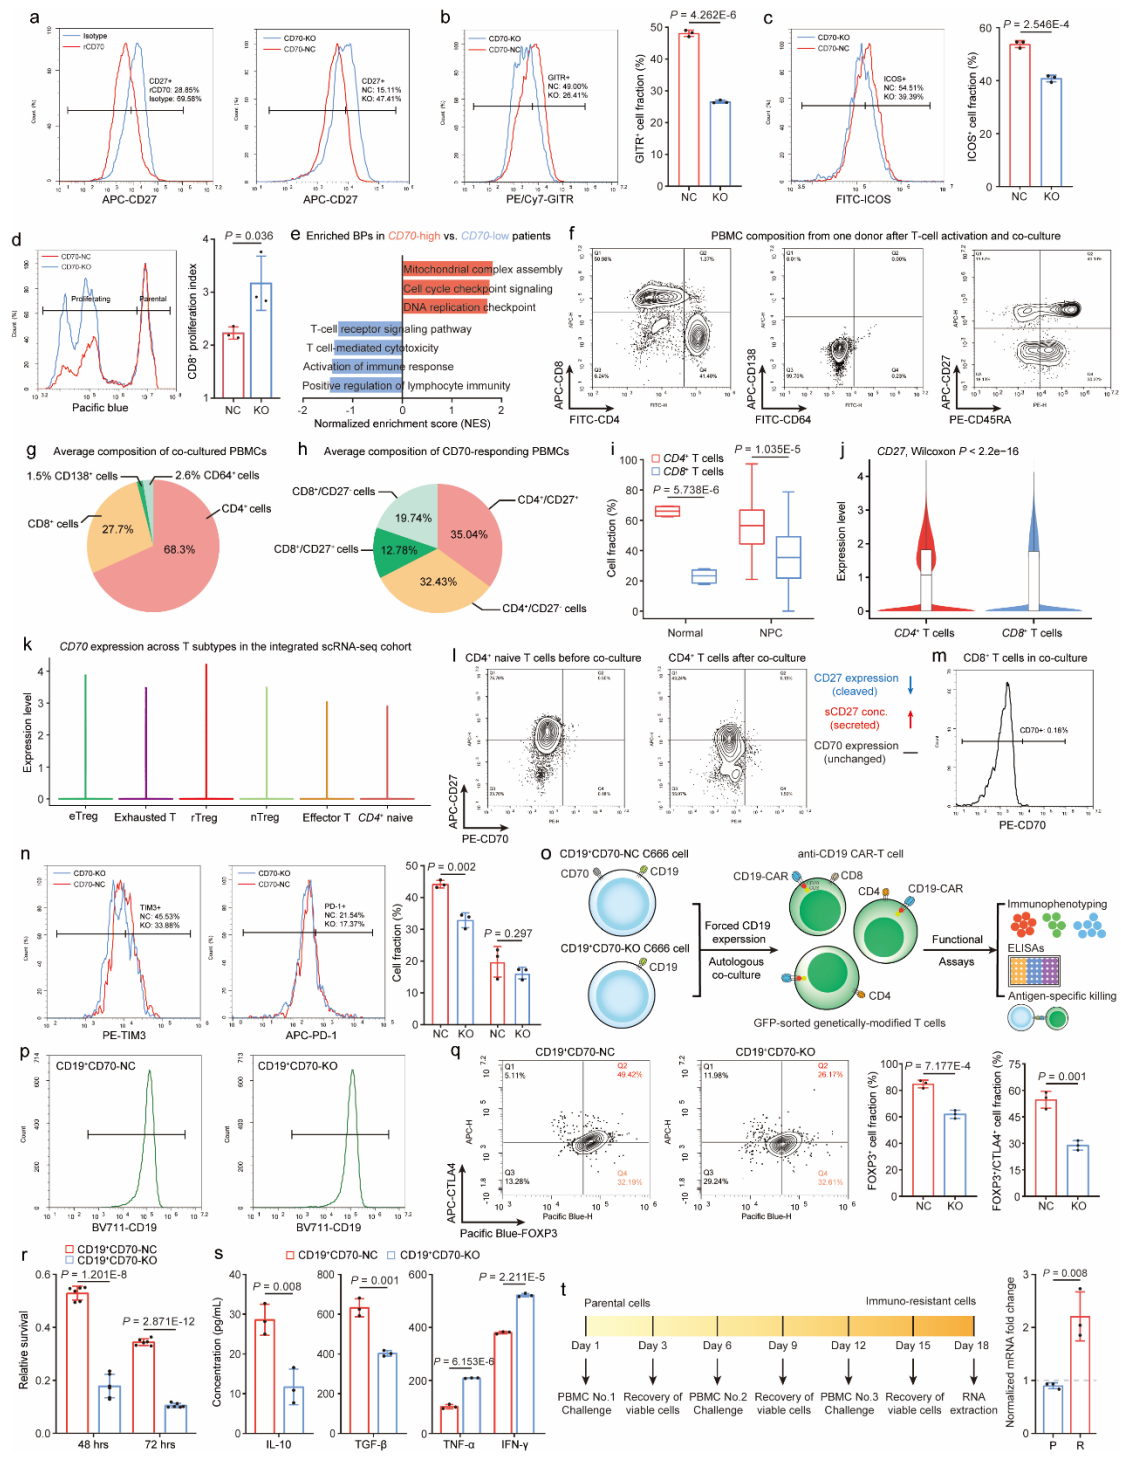

## Supplementary Figure 3 CD70 knockout promotes T-cell cytotoxicity by inhibiting Treg development and activation.

**a** Flow analysis of CD27 expression in IgG/rCD70-treated and co-cultured CD4+ naive T cells. **b, c** The fraction of GTR+ (**b**) and ICOS+ (**c**) cells in the co-cultured CD4+ naive T cells (n=3, two-sided unpaired t test). **d** The suppressive activity of co-cultured CD4+ naive T cells on paired CD8+ T cells (n=3, two-sided unpaired t test). **e** The enriched pathways in CD70-high/low NPC patients in GSE102349 (n=112). **f** Flow analysis of CD4, CD8, CD64, CD138, CD45RA and CD27 expression in co-cultured

PBMCs. **g** The fraction of CD4+, CD8+ T cells, CD64+ monocytes and CD138+ B cells in co-cultured PBMCs (n=3). **h** The fraction of T subtypes in co-cultured PBMCs (n=3). **i** The fractions of CD4+/CD8+ T cells in NPC (n=36) and INP (n=4) samples (two-sided unpaired t test). **j** The single-cell expression of *CD27* in CD4+ and CD8+ T cells (n=36, two-sided Wilcoxon signed-rank test). **k** The single-cell expression of *CD70* in T subtypes. **l, m** Flow analysis of *CD70/CD27* expression in CD4+ (**l**) and *CD70* expression in CD8+ T cells (**m**) in NPC co-culture systems. **n** The fractions of TIM3+/PD-1+ in CD8+ T cells in PBMC co-culture systems (n=3, two-sided unpaired t test). **o** Illustration of the antigen-specific co-culture between CD19+CD70-NC/CD19+CD70-KO C666 cells and anti-CD19 CAR-T cells. **p** Flow analysis of CD19 overexpression in CD70-NC and CD70-KO cells. **q** The fractions of FOXP3+ and FOXP3+/CTLA4+ Tregs in the antigen-specific co-culture systems (n=3, two-sided unpaired t test). **r** Antigen-specific T-cell cytotoxicity in the PBMC co-culture systems (n=3, two-sided unpaired t test). **s** The change of immunosuppressive and cytotoxic cytokines in antigen-specific NPC/CD4+ naïve T cell and PBMC co-culture systems (n=3, two-sided unpaired t test). **t** The mRNA change of *CD70* between parental and immuno-resilient C666 cells (n=3, two-sided unpaired t test). The n number represents n biologically independent samples/experiments in each group. The data are presented as the mean  $\pm$  SD (bar plots), median  $\pm$  IQR (whiskers = 1.5 $\times$ IQR, box & whiskers plots) and KDE (violin plots).

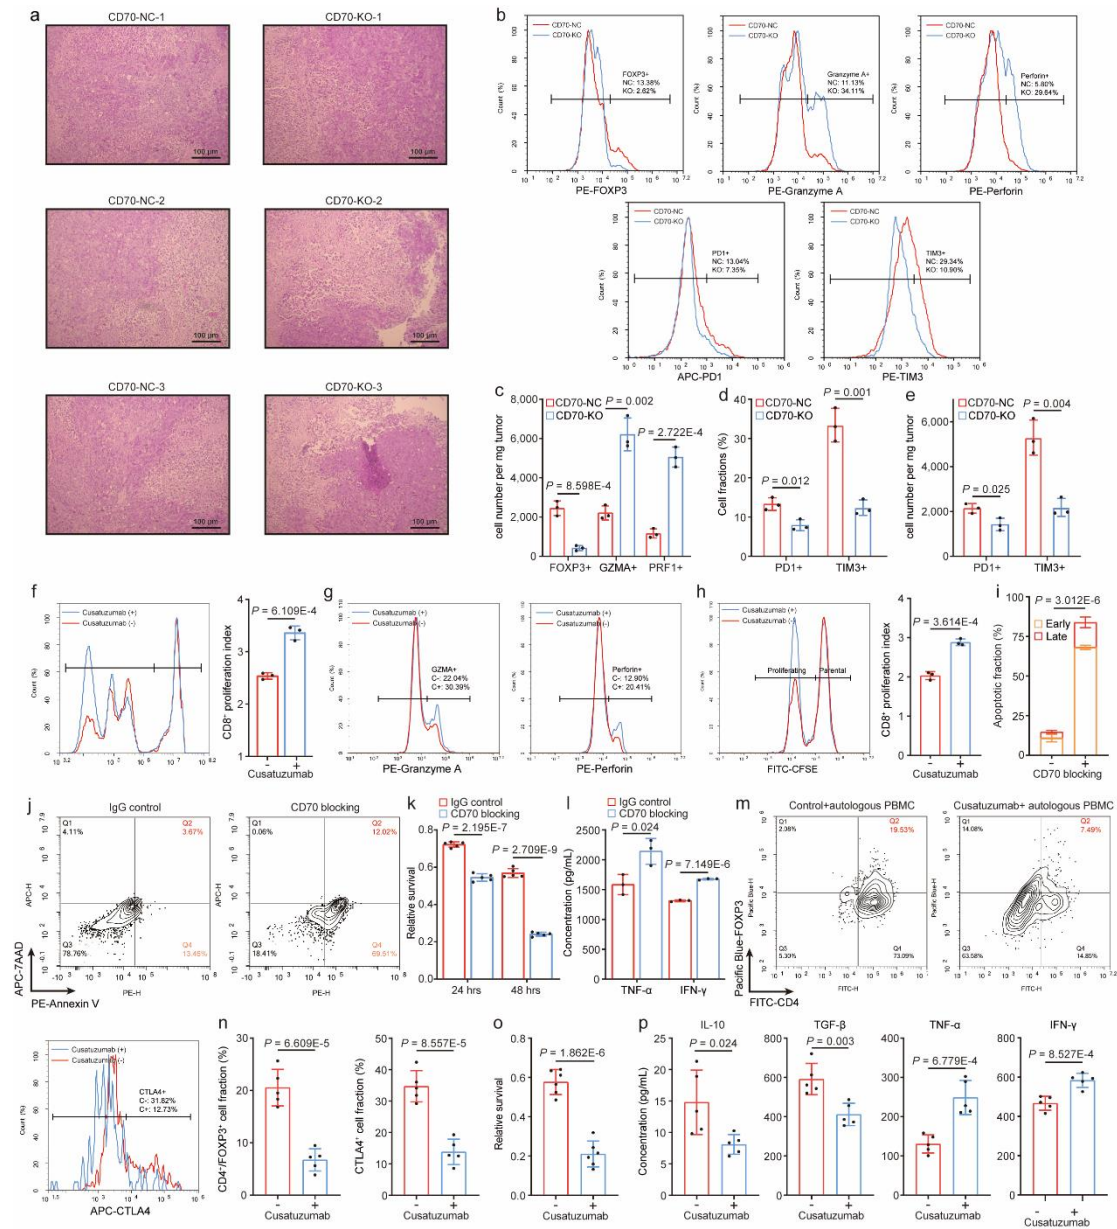

### Supplementary Figure 4 Therapeutic CD70 blocking reverts Treg-mediated immunosuppression.

**a** The representative H&E staining images showed immune infiltration in CD70-NC and CD70-KO tumors from humanized mice (n=3). **b** Flow analysis of FOXP3, Granzyme A and perforin expression in infiltrating CD4+ T cells and CD8+ T cells from CD70-NC and CD70-KO tumors. **c** Total numbers of FOXP3+, Granzyme A+ and perforin+ cells per mg of CD70-NC and CD70-KO (n=3, two-sided unpaired t test). **d** Fractions of TIM3+ and PD-1+ cells amongst CD8+ T cells from CD70-NC and CD70-KO tumors (n=3, two-sided unpaired t test). **e** Total numbers of TIM3+ and PD-1+ cells per mg of CD70-NC and CD70-KO tumors (n=3, two-sided unpaired t test). **f** The suppressive activity of co-cultured CD4+ naive T cells on paired CD8+ T cells (n=3, two-sided unpaired t test). **g** Flow analysis of Granzyme A and perforin



expression in CD8<sup>+</sup> T cells in the PBMC co-culture systems. **h** The change of CD8<sup>+</sup> T-cell proliferation in the PBMC co-culture systems. **i-k** T-cell cytotoxicity measured in the IgG-treated and CD70 blocking antibody-treated C666 (**i** and **j**, flow cytometry, n=3; **k**, XTT assay, n=5) PBMC co-culture systems (two-sided unpaired t test). **l** The change of CD8<sup>+</sup> T-cell cytotoxic cytokines in the PBMC co-culture systems (n=3, two-sided unpaired t test). **m, n** The fractions of CD4<sup>+</sup>/FOXP3<sup>+</sup> and CD4<sup>+</sup>/FOXP3<sup>+</sup>/CTLA4<sup>+</sup> Tregs amongst autologous PBMCs co-cultured with IgG-treated and cusatuzumab-treated primary NPC cells (n=5, two-sided unpaired t test). **o** T-cell cytotoxicity measured in the autologous PBMC co-culture system (n=6, two-sided unpaired t test). **p** The change of T-cell immunosuppressive and cytotoxic cytokines in the autologous PBMC co-culture system (n=5, two-sided unpaired t test). The n number represents n biologically independent samples/experiments in each group. The data are presented as the mean  $\pm$  SD (bar plots).

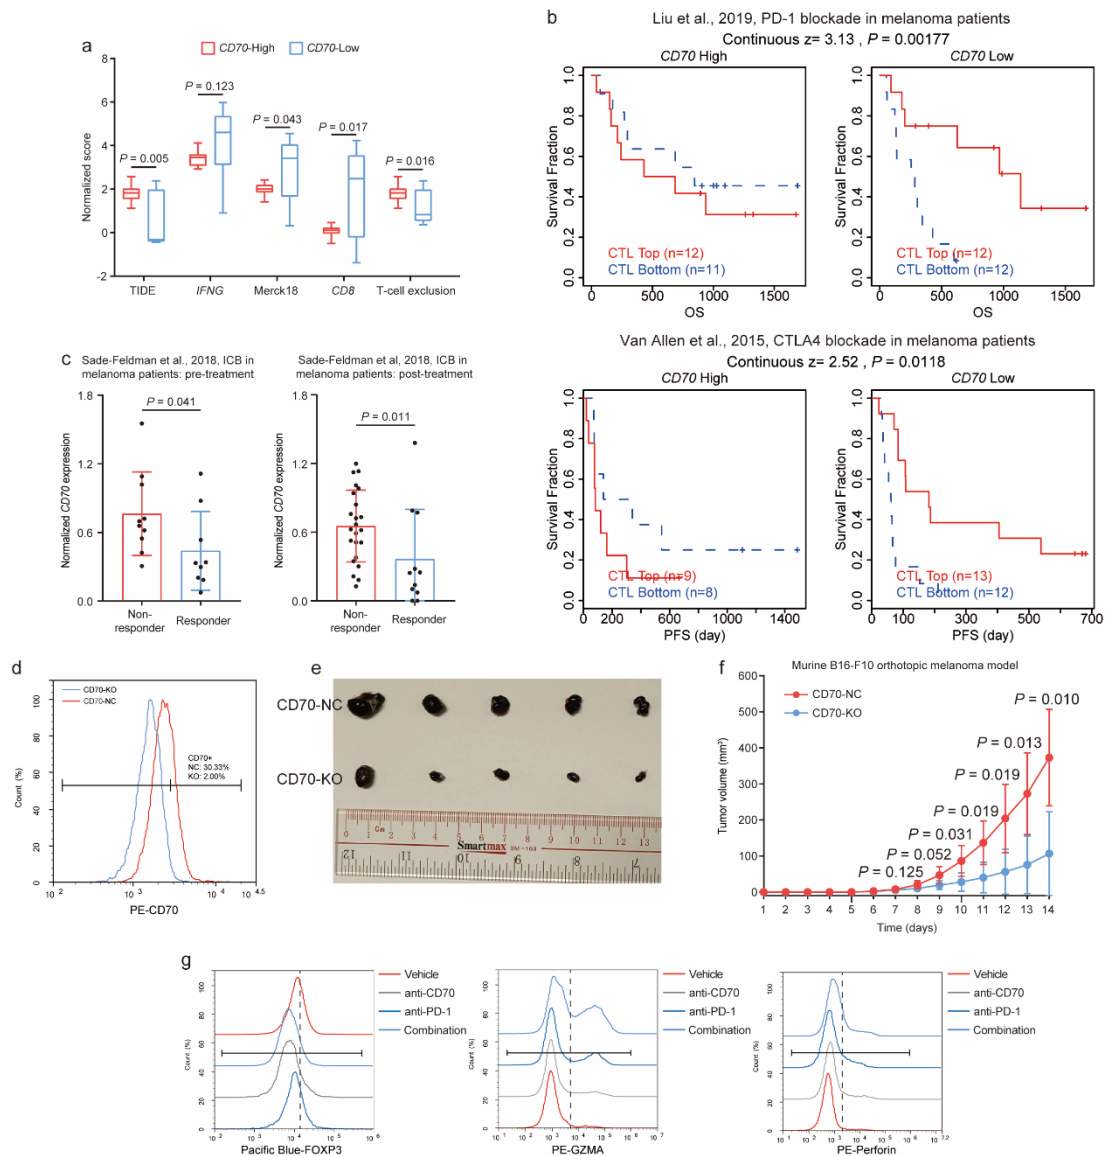

**Supplementary Figure 5 CD70 expression correlates to immunotherapy responses in NPC and melanoma patients.**

**a** ICB responsiveness (TIDE score), T-cell dysfunction, and exclusion scores in *CD70*-high and *CD70*-low NPC patients with top 10 highest TIDE scores (n=10, two-sided unpaired t test), predicted by the TIDE module (<http://tide.dfci.harvard.edu/>). **b** The correlation between *CD70* and T cell dysfunction and inferior treatment outcome in melanoma patients received with PD-1 blockade (n=47) in the Liu et al. cohort<sup>1</sup> and melanoma patients received with CTLA4 blockade (n=42) in the Van Allen et al. cohort<sup>2</sup> (two-sided log-rank test). **c** The correlation between *CD70* and ICB responses in pre (non-responder n=10, responder n=9) and post-treatment (non-responder n=23, responder n=11) melanoma patients in the Sade-Feldman et al. cohort<sup>3</sup> (two-sided unpaired t test). **d** Flow analysis of *CD70* expression in B16-F10 melanoma cells after CRISPR-mediated *CD70*-KO. **e** The representative image of freshly dissected *CD70*-NC and *CD70*-KO B16-F10 tumors in C57BL/6 mice (n=5). **f** The *CD70*-NC and

CD70-KO B16-F10 tumor growth in C57BL/6 mice (n=5, two-sided unpaired t test). **g** Flow analysis of FOXP3, Granzyme A and perforin expression in CD4<sup>+</sup> T cells and CD8<sup>+</sup> T cells isolated from IgG-treated, cusatuzumab-treated, camrelizumab-treated and combination-treated Xeno76 tumors in humanized mice. The n number represents n biologically independent samples/experiments in each group. The data are presented as the mean  $\pm$  SD (bar plots) and median  $\pm$  IQR (whiskers = 1.5 $\times$ IQR, box & whiskers plots).

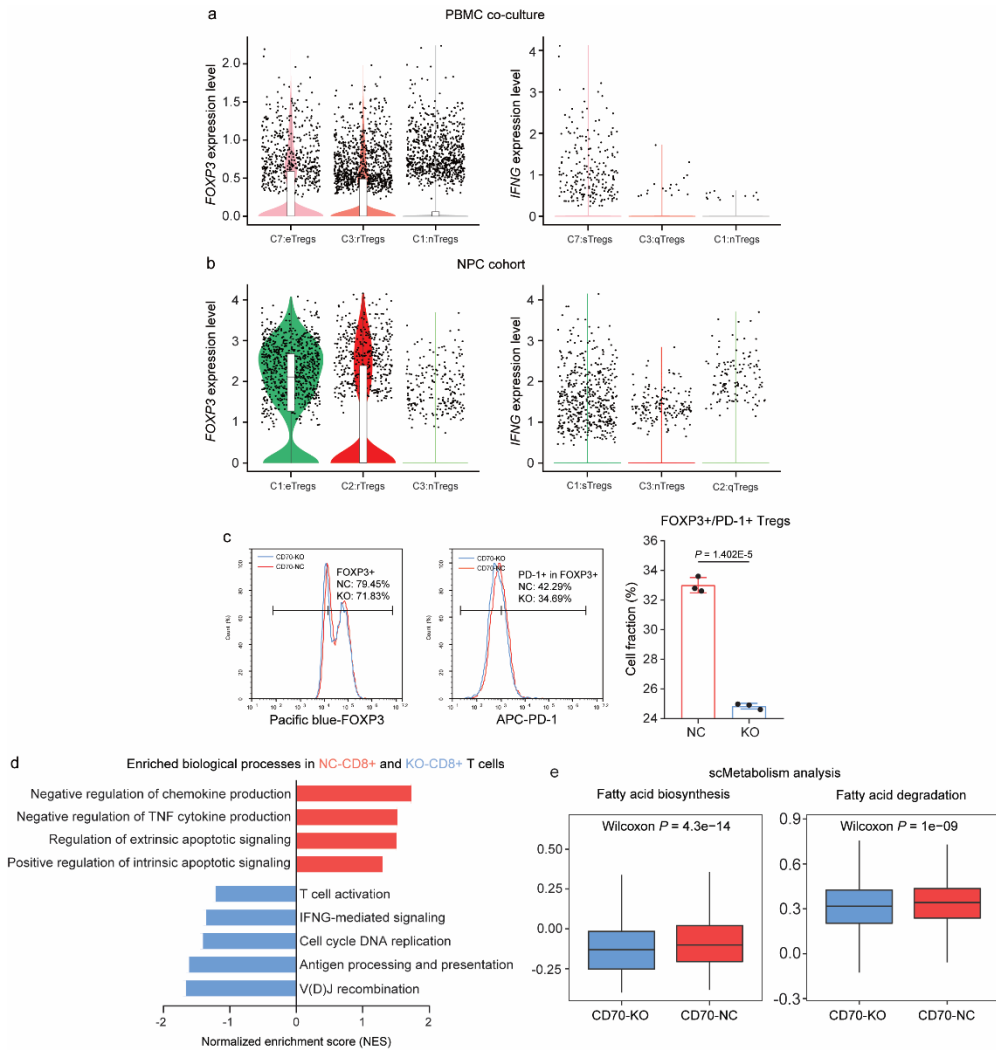

## Supplementary Figure 6 Single-cell analysis reveals CD70-mediated immunophenotyping alterations in Tregs and CD8+ T cells.

**a** The expression level of FOXP3 and IFNG in nTregs, rTregs, and eTregs in the co-cultured PBMC single-cell cohort (n=3168, 2446, and 1381). **b** Expression level of FOXP3 and IFNG in nTregs, rTregs, and eTregs in the integrated NPC single-cell cohort (n=4756, 6992 and 8935). **c** PD-1 expression on FOXP3+ Tregs co-cultured with CD70-NC and CD70-KO NPC cells. Left: flow cytometry analysis of expression of surface PD-1 in co-cultured FOXP3+ Tregs; Right: the quantified fraction of PD-1+/FOXP3+ in the PBMC co-culture system with CD70-NC and CD70-KO C666 cells (n=3, two-sided unpaired t test). **d** Enriched GO:BP pathways associated with immune response in NC-CD8+ T cells and KO-CD8+ T cells, revealed by GSEA. **e** Enriched fatty acid metabolism-associated activities in NC-Tregs and KO-Tregs, identified by scMetabolism analysis (n=3731 and 3264, two-sided Wilcoxon signed-rank test). The n number represents n biologically independent cells/samples/experiments in each group. The data are presented as the mean  $\pm$  SD (bar plots), median  $\pm$  IQR (whiskers =  $1.5 \times$  IQR, box & whiskers plots) and KDE (violin plots).

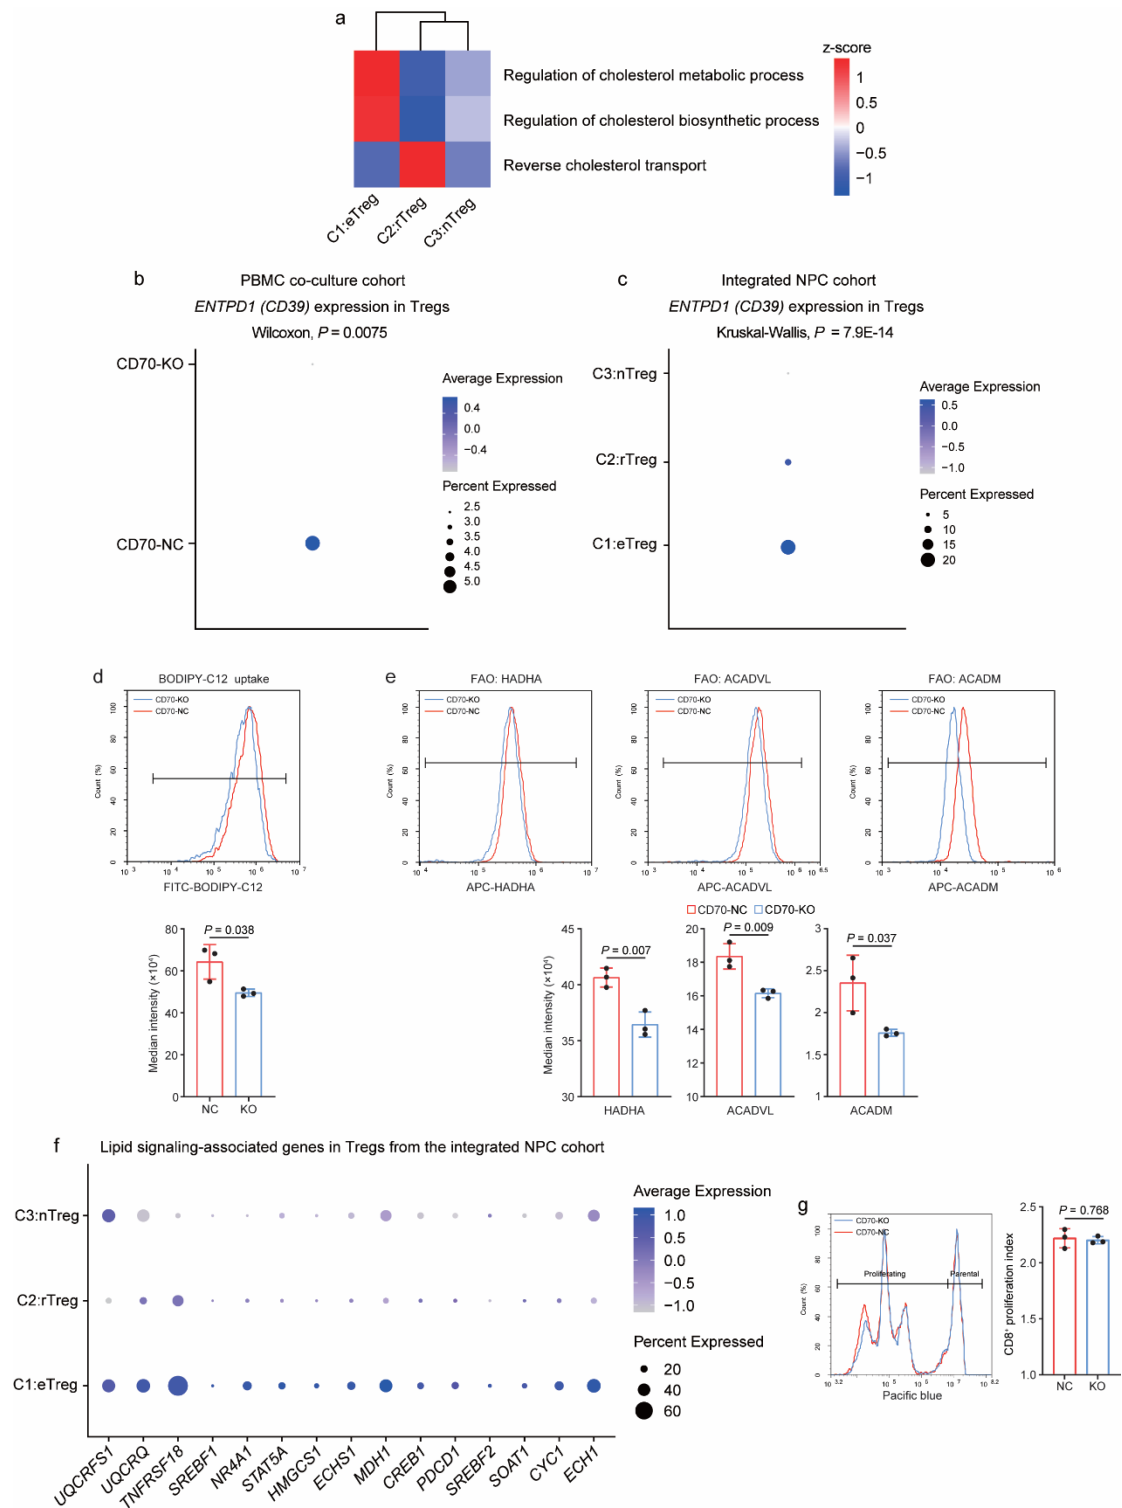

## Supplementary Figure 7 CD70+ NPC cells influence lipid signaling in co-cultured CD4+ naïve T cells and Tregs.

**a** GSVA revealed cholesterol-associated activities in Treg subtypes from the integrated NPC single-cell cohort. **b** Expression of *ENTPD1* (encodes CD39) in NC-Tregs and KO-

Tregs in the PBMC co-culture cohort (two-sided Wilcoxon signed-rank test). **c** Expression of *ENTPI* across three Treg subtypes in the integrated NPC cohort (Kruskal-Wallis one-way analysis of variance). **d** The median intensity of intracellular BODIPY-C12 taken up by Tregs co-cultured with CD70-NC and CD70-KO C666 cells (n=3, two-sided unpaired t test). **e** The median intensity of three key FAO enzymes in Tregs co-cultured with CD70-NC and CD70-KO C666 cells (n=3, two-sided unpaired t test). **f** The single-cell expression and average of 15 representative gene associated with lipid signaling in eTregs, rTregs and nTregs from the NPC scRNA-seq cohort (Wilcoxon signed-rank test). **g** The suppressive activity of co-cultured CD4<sup>+</sup> naïve T cells without lipid supplementation on paired CD8<sup>+</sup> T cells (n=3, two-sided unpaired t test). The n number represents n biologically independent samples/experiments in each group. The data are presented as the mean  $\pm$  SD (bar plots).

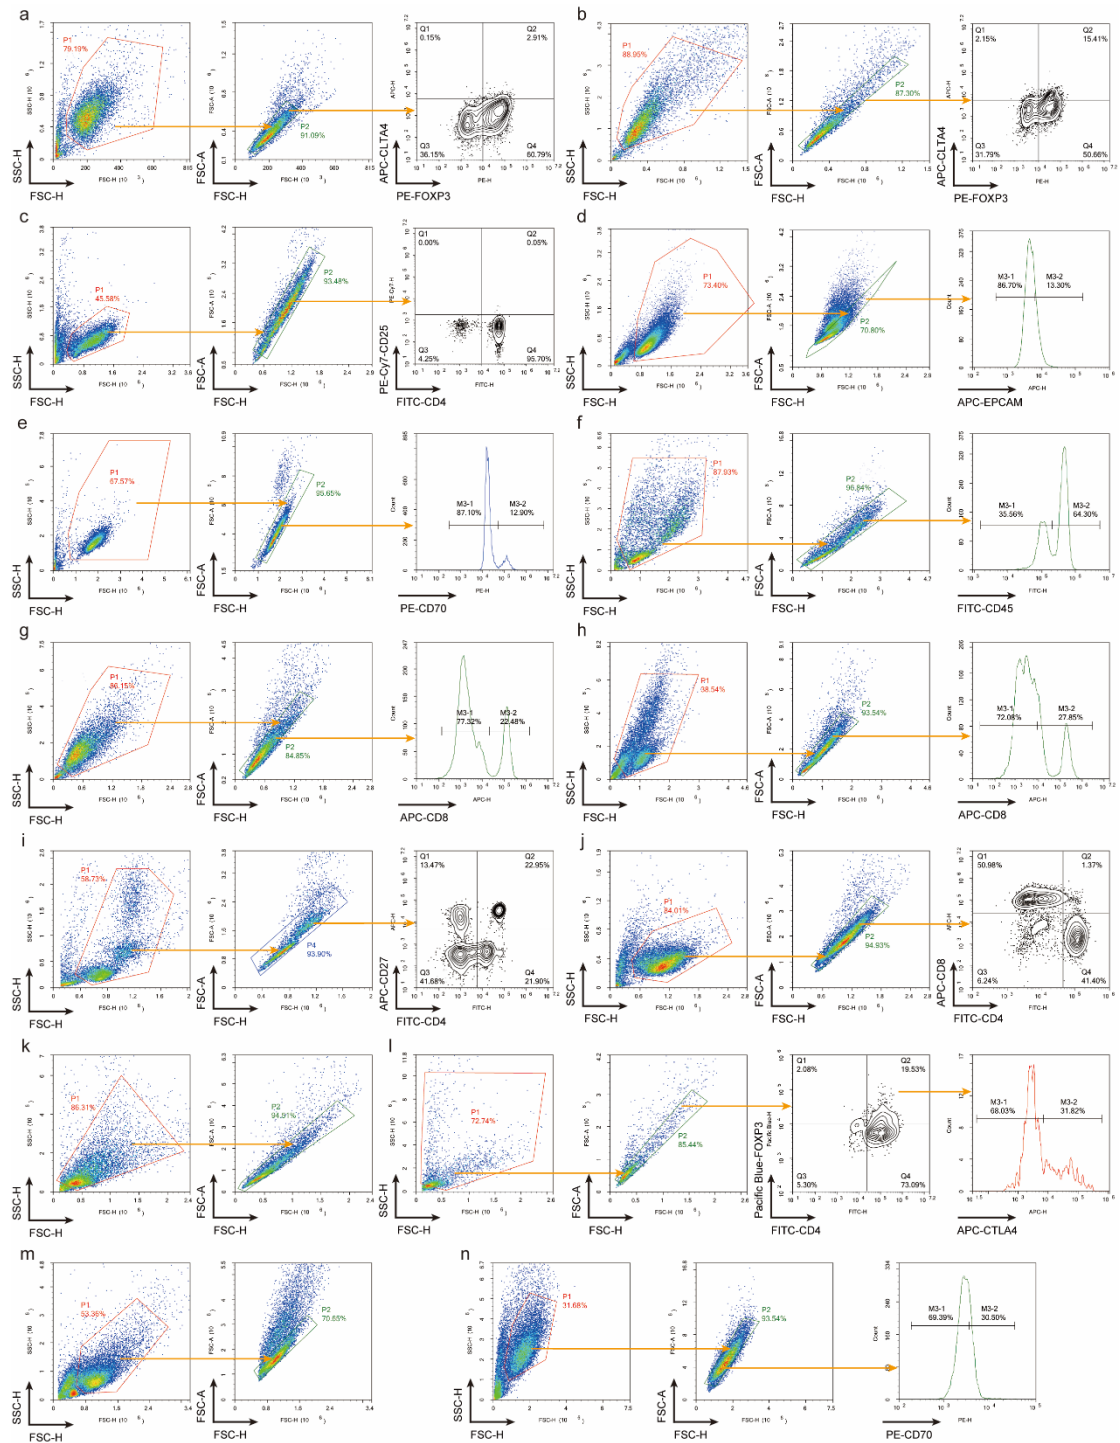

### Supplementary Figure 8 Gating strategy for flow cytometry analysis.

**a** Gating strategy for flow cytometry analysis of direct co-culture assays between CD4+ naïve T cells/Tregs and NPC/NPE cells, including Figures 1j, 2n, 3a, 3c, 3e, 3g, 4a, 4c, 6c, 6g, 6h, 6p, 6q, 6v, 6w, and Supplementary Figures 3a-3c, 3i, 3m, 3q, 6c, 7d and 7e.

**b** Gating strategy for flow cytometry analysis of transwell-based co-culture assays between CD4+ naïve T cells and NPC/NPE cells, including Figure 1j.

**c** Gating strategy for flow cytometry analysis of CD4<sup>+</sup> naïve T differentiation assay without NPC/NPE cell co-culture, including Supplementary Figures 1m and 1n.

**d** Gating strategy for flow cytometry analysis of primary NPC tissues, including Figure 2e.

**e** Gating strategy for flow cytometry analysis of NPC/NPE cell lines, including Figures 2m, 7a, 7i, 7j and Supplementary Figures 2j, 2k and 2p, as well as flow sorting of CD70-C666 and B16-F10 cells.

**f** Gating strategy for flow cytometry analysis of NPC/PBMC killing assays, including Figures 3j, 3k, 4e, 4f, 4i, 4n and Supplementary Figures 4i and 4j.

**g** Gating strategy for flow cytometry analysis of CD8<sup>+</sup> T cells in co-cultured PBMCs, including Figures 3m, 3n, 4h, and Supplementary Figures 3n and 4g.

**h** Gating strategy for flow cytometry analysis of CD8<sup>+</sup> T cell proliferation in co-cultured PBMCs and Treg suppression assays, including Figures 3p, 3q and Supplementary Figures 3d, 4f, 4h and 7g.

**i** Gating strategy for flow cytometry analysis of isolated PBMCs, including Supplementary Figures 3f and 3h.

**j** Gating strategy for flow cytometry analysis of expanded PBMCs, including Supplementary Figures 3f and 3g.

**k** Gating strategy for flow cytometry analysis of tumor-infiltrating T cells from humanized mice, including Figures 3t, 4q and Supplementary Figures 4b-4e and 5g.

**l** Gating strategy for flow cytometry analysis of co-culture assays using primary NPC cells, including Supplementary Figures 4m-4n.

**m** Gating strategy for flow cytometry analysis of Xeno76, including Figure 4j.

**n** Gating strategy for flow cytometry analysis of the B16-F10 cell line, including Supplementary Figure 5d.



**Supplementary Table 1 Clinical parameter associated with Treg suppressive score in 42 NPC patients from GSE68799**

| Characteristics | Treg suppressive score |            | Statistics |                |
|-----------------|------------------------|------------|------------|----------------|
|                 | Low                    | High       | Chi-square | <i>P</i> value |
| Stage           |                        |            |            |                |
| II              | 4 (66.7%)              | 2 (33.3%)  | 1.018      | 0.400          |
| III             | 16 (44.4%)             | 20 (55.6%) |            |                |
| Age             |                        |            |            |                |
| >60             | 14 (48.3%)             | 15 (51.7%) | 0.016      | 1.000          |
| <60             | 6 (46.2%)              | 7 (53.8%)  |            |                |
| Sex             |                        |            |            |                |
| Female          | 4 (44.4%)              | 5 (55.6%)  | -0.033     | 1.000          |
| Male            | 16 (48.5%)             | 17 (51.5%) |            |                |

\*Two-sided chi-square test was used to compute the statistical significance.

**Supplementary Table 2 The mass spectrometry result of intracellular fatty acids in CD4+ naïve T cells co-cultured with CD70-NC and CD70-KO C666 cells.**

| nmol/million cells | CD70-NC  | CD70-KO  |
|--------------------|----------|----------|
| C4:0               | 0        | 0        |
| C6:0               | 0        | 0        |
| C8:0               | 0        | 0        |
| C10:0              | 0        | 0        |
| C11:0              | 0        | 0        |
| C12:0              | 0.231629 | 0.205992 |
| C13:0              | 0        | 0        |
| C14:0              | 1.068738 | 0.866816 |
| C14:1              | 0        | 0        |
| C15:0              | 0.144098 | 0.118907 |
| C15:1              | 0.143844 | 0.123486 |
| C16:0              | 7.317763 | 5.880865 |
| C16:1              | 0.461141 | 0.311316 |
| C17:0              | 0.240546 | 0.190259 |
| C17:1              | 0        | 0        |
| C18:0              | 5.173723 | 4.222482 |
| C18:1, trans       | 0        | 0        |
| C18:1, cis         | 4.117237 | 3.000295 |
| C18:2, trans       | 0        | 0        |
| C18:2, cis         | 1.512408 | 1.131018 |
| C18:3 n6           | 0        | 0        |
| C18:3 n3           | 0        | 0        |
| C20:0              | 1.509817 | 1.304967 |
| C20:1 n9           | 0.177313 | 0.125406 |
| C20:2              | 0.282357 | 0.193916 |
| C21:0              | 0.01739  | 0.013381 |
| C20:3 n6           | 0.703868 | 0.403206 |
| C20:4 n6           | 4.36168  | 3.332361 |
| C20:3 n3           | 0        | 0        |
| C20:5              | 0.475872 | 0.419609 |
| C22:0              | 1.846567 | 1.605485 |
| C22:1              | 0        | 0        |
| C22:2              | 0        | 0        |
| C23:0              | 0        | 0        |
| C24:0              | 2.06315  | 1.763007 |
| C22:6              | 3.776627 | 2.643538 |
| C24:1              | 0.270887 | 0.214843 |
| C26:0              | 1.976447 | 1.721675 |
| Total              | 37.8731  | 29.79283 |

**Supplementary Table 3 qRT-PCR primers used in this study.**

| qRT-PCR primers          |                         |
|--------------------------|-------------------------|
| Gene                     | Sequencing (5' - 3')    |
| <i>FOXP3</i> _forward    | GTGGCCCGGATGTGAGAAG     |
| <i>FOXP3</i> _reverse    | GGAGCCCTTGTCGGATGATG    |
| <i>IL2RA</i> _forward    | CGCAGAATAAAAAGCGGGTCA   |
| <i>IL2RA</i> _reverse    | ACTTGTTTCGTTGTGTTCCGA   |
| <i>IKZF2</i> _forward    | GCAGCCTAGAAGAACCCCTAA   |
| <i>IKZF2</i> _reverse    | CATTCGGAAGCCGGATTCT     |
| <i>CTLA4</i> _forward    | GCCCTGCACTCTCCTGTTTT    |
| <i>CTLA4</i> _reverse    | GGTTGCCGCACAGACTTCA     |
| <i>LAYN</i> _forward     | ACAGAGCTGACAACACCTGTA   |
| <i>LAYN</i> _reverse     | GATGTAGGCCAGATTCAAGGC   |
| <i>SOX4</i> _forward     | GACCTGCTCGACCTGAACC     |
| <i>SOX4</i> _reverse     | CCGGGCTCGAAGTTAAAATCC   |
| <i>TNFRSF4</i> _forward  | GCAATAGCTCGGACGCAATCT   |
| <i>TNFRSF4</i> _reverse  | GAGGGTCCCTGTGAGGTTCT    |
| <i>TNFRSF9</i> _forward  | AGCTGTTACAACATAGTAGCCAC |
| <i>TNFRSF9</i> _reverse  | GGACAGGGACTGCAAATCTGAT  |
| <i>ICOS</i> _forward     | ACAACCTGGACCATTCTCATGC  |
| <i>ICOS</i> _reverse     | TGCACATCCTATGGGTAACCA   |
| <i>IL10</i> _forward     | GACTTTAAGGGTTACCTGGGTTG |
| <i>IL10</i> _reverse     | TCACATGCGCCTTGATGTCTG   |
| <i>TGFBI</i> _forward    | CAATTCCTGGCGATACCTCAG   |
| <i>TGFBI</i> _reverse    | GCACAACCTCCGGTGACATCAA  |
| <i>MKI67</i> _forward    | GCCTGCTCGACCCTACAGA     |
| <i>MKI67</i> _reverse    | GCTTGTCAACTGCGGTTGC     |
| <i>TNFRSF18</i> _forward | CAGTCCCAGGGGAAATTCAGT   |
| <i>TNFRSF18</i> _reverse | GAACACAGTGAGAAACCCGAA   |
| <i>TIGIT</i> _forward    | TGGTCGCGTTGACTAGAAAGA   |
| <i>TIGIT</i> _reverse    | GGGCTCCATTCTCCTGTC      |
| <i>UQCRC1</i> _forward   | CGTCACCCAGTTCGTTTCCA    |
| <i>UQCRC1</i> _reverse   | AGGGGTTTGCTCTCCATTG     |
| <i>UQCRC1</i> _forward   | GGGGCACAAGTGCTATTGC     |
| <i>UQCRC1</i> _reverse   | GTTGTCCAGCAGGCTAACC     |
| <i>CYC1</i> _forward     | CTTCGCGGGGTAGTGTTGG     |
| <i>CYC1</i> _reverse     | GGCCAGACTTCGACGACAA     |
| <i>SREBF1</i> _forward   | CGGAACCATCTTGCAACAGT    |
| <i>SREBF1</i> _reverse   | CGCTTCTCAATGGCGTTGT     |
| <i>SREBF2</i> _forward   | AACGGTCATTCACCCAGGTC    |
| <i>SREBF2</i> _reverse   | GGCTGAAGAATAGGAGTTGCC   |
| <i>SOLE</i> _forward     | TGACAATTCTCATCTGAGGTCCA |

|                       |                         |
|-----------------------|-------------------------|
| <i>SQLE_reverse</i>   | CAGGGATACCCTTTAGCAGTTTT |
| <i>SCAP_forward</i>   | GTGGACTCTGACCGCAAACAA   |
| <i>SCAP_reverse</i>   | CGGGACAAAGGTGAACGAAATAC |
| <i>SCARBI_forward</i> | AATAAGCCCATGACCCTGAAGC  |
| <i>SCARBI_reverse</i> | GCCCCACATGATCTCACCC     |
| <i>LDLR_forward</i>   | ACGGCGTCTCTTCCTATGACA   |
| <i>LDLR_reverse</i>   | CCCTTGGTATCCGCAACAGA    |
| <i>HMGCR_forward</i>  | TGATTGACCTTTCCAGAGCAAG  |
| <i>HMGCR_reverse</i>  | CTAAAATTGCCATTCCACGAGC  |
| <i>HMGCSI_forward</i> | CATTAGACCGCTGCTATTCTGTC |
| <i>HMGCSI_reverse</i> | TTCAGCAACATCCGAGCTAGA   |
| <i>PGGT1B_forward</i> | TCTCCGGGCTGGATATGTTG    |
| <i>PGGT1B_reverse</i> | CGGAAACCACAGCGATTTAGAT  |
| <i>FNTB_forward</i>   | TTTCACCTACTATTGCCCTCCA  |
| <i>FNTB_reverse</i>   | CGTGACTGTTTCCACCGAGT    |
| <i>GGPS1_forward</i>  | ACAGCATCTATGGAATCCCATCT |
| <i>GGPS1_reverse</i>  | CAAAGCTGGCGGGTAAAAAG    |
| <i>PDCD1_forward</i>  | CCAGGATGGTTCTTAGACTCCC  |
| <i>PDCD1_reverse</i>  | TTAGCACGAAGCTCTCCGAT    |
| <i>CD44_forward</i>   | CTGCCGCTTTGCAGGTGTA     |
| <i>CD44_reverse</i>   | CATTGTGGGCAAGGTGCTATT   |
| <i>SOAT1_forward</i>  | GAAGTTGGCAGTCACTTTGATGA |
| <i>SOAT1_reverse</i>  | GAGCGCACCCACCATTATCTA   |
| <i>SOAT2_forward</i>  | ATGGAAACACTGAGACGCACA   |
| <i>SOAT2_reverse</i>  | GGTAGGATTGTATAGCCTCCCG  |
| <i>CPT1A_forward</i>  | ATCAATCGGACTCTGGAAACGG  |
| <i>CPT1A_reverse</i>  | TCAGGGAGTAGCGCATGGT     |
| <i>CCDC58_forward</i> | AGTGGCGGTGTGAACTGTG     |
| <i>CCDC58_reverse</i> | GCTGTTGGAACCGTAGTGTTTA  |
| <i>LGALS3_forward</i> | ATGGCAGACAATTTTTCGCTCC  |
| <i>LGALS3_reverse</i> | GCCTGTCCAGGATAAGCCC     |
| <i>STAT5A_forward</i> | GCAGAGTCCGTGACAGAGG     |
| <i>STAT5A_reverse</i> | CCACAGGTAGGGACAGAGTCT   |
| <i>CREB1_forward</i>  | TTAACCATGACCAATGCAGCA   |
| <i>CREB1_reverse</i>  | TGGTATGTTTGTACGTCTCCAGA |
| <i>CEBPB_forward</i>  | CTTCAGCCCGTACCTGGAG     |
| <i>CEBPB_reverse</i>  | GGAGAGGAAGTCGTGGTGC     |
| <i>FASN_forward</i>   | GCAAGCTGAAGGACCTGTCT    |
| <i>FASN_reverse</i>   | AATCTGGGTTGATGCCTCCG    |
| <i>ACACA_forward</i>  | ATGTCTGGCTTGCACCTAGTA   |
| <i>ACACA_reverse</i>  | CCCCAAAGCGAGTAACAAATTCT |
| <i>JUN_forward</i>    | TCCAAGTGCCGAAAAAGGAAG   |
| <i>JUN_reverse</i>    | CGAGTTCTGAGCTTTCAAGGT   |

|                      |                         |
|----------------------|-------------------------|
| <i>PPARA_forward</i> | ATGGTGGACACGGAAAGCC     |
| <i>PPARA_reverse</i> | CGATGGATTGCGAAATCTCTTGG |
| <i>PPARG_forward</i> | TACTGTCCGTTTCAGAAATGCC  |
| <i>PPARG_reverse</i> | GTCAGCGGACTCTGGATTCAG   |
| <i>NR4A1_forward</i> | GGCTCGGGGATACTGGATACA   |
| <i>NR4A1_reverse</i> | CTGGCATGAAGCGTTGTCC     |
| <i>NR4A2_forward</i> | GCACTCCGGGTCGGTTTAC     |
| <i>NR4A2_reverse</i> | GCCACGTAGTTCTGGTGGAA    |
| <i>ECHS1_forward</i> | TGTCCTGTTGAGACACTGGTG   |
| <i>ECHS1_reverse</i> | ACAAACGCGGTCATCCCTTC    |
| <i>FABP5_forward</i> | TGAAGGAGCTAGGAGTGGGAA   |
| <i>FABP5_reverse</i> | TGCACCATCTGTAAAGTTGCAG  |
| <i>SDC1_forward</i>  | ACGGCTATTCCCACGTCTC     |
| <i>SDC1_reverse</i>  | TCTGGCAGGACTACAGCCTC    |
| <i>MDH1_forward</i>  | TTTGATCACAACCGAGCTAAAG  |
| <i>MDH1_reverse</i>  | ACATCTGGATACTGAGTCGAGG  |
| <i>MDH2_forward</i>  | GCCATGATCTGCGTCATTGC    |
| <i>MDH2_reverse</i>  | CCGAAGATTTTGTGGGGTTGT   |
| <i>ECH1_forward</i>  | TCATCACTCGATACCAGGAGAC  |
| <i>ECH1_reverse</i>  | GGCACAGTACCGGATGTCA     |
| <i>ATF4_forward</i>  | CCCTTCACCTTCTTACAACCTC  |
| <i>ATF4_reverse</i>  | TGCCAGCTCTAAACTAAAGGA   |
| <i>RAC2_forward</i>  | CAACGCCTTTCCCGGAGAG     |
| <i>RAC2_reverse</i>  | TCCGTCTGTGGATAGGAGAGC   |
| <i>EGR1_forward</i>  | GGTCAGTGGCCTAGTGAGC     |
| <i>EGR1_reverse</i>  | GTGCCGCTGAGTAAATGGGA    |
| <i>TBX21_forward</i> | GTCCAACAATGTGACCCAGAT   |
| <i>TBX21_reverse</i> | ACCTCAACGATATGCAGCCG    |
| <i>MITF_forward</i>  | CAGTCCGAATCGGGGATCG     |
| <i>MITF_reverse</i>  | TGCTCTTCAGCGGTTGACTTT   |
| <i>CD36_forward</i>  | CTTTGGCTTAATGAGACTGGGAC |
| <i>CD36_reverse</i>  | GCAACAAACATCACCACACCA   |
| <i>GSTP1_forward</i> | CCCTACACCGTGGTCTATTTCC  |
| <i>GSTP1_reverse</i> | CAGGAGGCTTTGAGTGAGC     |

**Supplementary Table 4 sgRNA sequences used in this study.**

| sgRNA primers               |                               |                |
|-----------------------------|-------------------------------|----------------|
| Human Gene                  | Sequencing (5' - 3')          | Efficacy score |
| <i>CD70</i> -sgRNA1_forward | CACCgGGGTTCGGGCTGCTCGGTG      | 0.77           |
| <i>CD70</i> -sgRNA1_reverse | AAACCACCGAGCAGCCCGAACCCC      |                |
| <i>CD70</i> -sgRNA2_forward | CACCgCGGTGCGGCAGGCCCTA        | 0.72           |
| <i>CD70</i> -sgRNA2_reverse | AAACTAGGGCCTGCGCCGCACCGC      |                |
| <i>CD70</i> -sgRNA3_forward | CACCgGGTGCGGCGCAGGCCCTAT      | 0.68           |
| <i>CD70</i> -sgRNA3_reverse | AAACATAGGGCCTGCGCCGCACCC      |                |
| <i>CD70</i> -sgRNA4_forward | CACCGGCCCTATGGGTGCGTCCTG      | 0.74           |
| <i>CD70</i> -sgRNA4_reverse | AAACCAGGACGCACCCATAGGGCC      |                |
| <i>CD70</i> -sgRNA5_forward | CACCgGCTTTGGTCCCATTGGTCG      | 0.74           |
| <i>CD70</i> -sgRNA5_reverse | AAACCGACCAATGGGACCAAAGCC      |                |
| Mouse Gene                  | Sequencing (5' - 3')          | Efficacy score |
| <i>cd70</i> -sgRNA1_forward | CACCgCCAGCAGCAGCCATGGCCAT     | 0.72           |
| <i>cd70</i> -sgRNA1_reverse | AAACATGGCCATGGCTGCTGCTGG<br>C |                |
| <i>cd70</i> -sgRNA2_forward | CACCGGAAGGTCGCCCTTGCCCCT      | 0.77           |
| <i>cd70</i> -sgRNA2_reverse | AAACAGGGGCAAGGGCGACCTTCC      |                |
| <i>cd70</i> -sgRNA3_forward | CACCgAGGAAGGTCGCCCTTGCCCC     | 0.66           |
| <i>cd70</i> -sgRNA3_reverse | AAACGGGGCAAGGGCGACCTTCCT<br>C |                |
| <i>cd70</i> -sgRNA4_forward | CACCgTGGCCATTGGCGCTGGAACG     | 0.73           |
| <i>cd70</i> -sgRNA4_reverse | AAACCGTTCCAGCGCCAATGGCCA<br>C |                |
| <i>cd70</i> -sgRNA5_forward | CACCgTCCCGCTCCAGCGAACCCAG     | 0.75           |
| <i>cd70</i> -sgRNA5_reverse | AAACCTGGGTTCGCTGGAGCGGGA<br>C |                |

**Supplementary Table 5 Information about antibodies used in this study.**

| Flow Antibody                                 | Clone number | Vendor    | Catalog No. | Dilution | Validation website                                                                                                                                                                                                                |
|-----------------------------------------------|--------------|-----------|-------------|----------|-----------------------------------------------------------------------------------------------------------------------------------------------------------------------------------------------------------------------------------|
| PE anti-human FOXP3 Antibody                  | 206D         | BioLegend | 320108      | 1:20     | <a href="https://www.biolegend.com/en-us/products/pe-anti-human-foxp3-antibody-3178?GroupID=BLG8612">https://www.biolegend.com/en-us/products/pe-anti-human-foxp3-antibody-3178?GroupID=BLG8612</a>                               |
| APC anti-human CD152 (CTLA-4) Antibody        | L3D10        | BioLegend | 349908      | 1:20     | <a href="https://www.biolegend.com/ja-jp/products/apc-anti-human-cd152-ctla-4-antibody-6999">https://www.biolegend.com/ja-jp/products/apc-anti-human-cd152-ctla-4-antibody-6999</a>                                               |
| APC anti-human CD27 Antibody                  | O323         | BioLegend | 302810      | 1:50     | <a href="https://www.biolegend.com/de-at/products/apc-anti-human-cd27-antibody-808?GroupID=BLG7922">https://www.biolegend.com/de-at/products/apc-anti-human-cd27-antibody-808?GroupID=BLG7922</a>                                 |
| APC/Cyanine7 anti-human CD45RO Antibody       | UCHL1        | BioLegend | 304228      | 1:20     | <a href="https://www.biolegend.com/en-us/products/apc-cyanine7-anti-human-cd45ro-antibody-7372?GroupID=GROUP658">https://www.biolegend.com/en-us/products/apc-cyanine7-anti-human-cd45ro-antibody-7372?GroupID=GROUP658</a>       |
| PE/Cyanine7 anti-human CD25 Antibody          | BC96         | BioLegend | 302612      | 1:50     | <a href="https://www.biolegend.com/en-us/products/pe-cyanine7-anti-human-cd25-antibody-1909?GroupID=BLG7919">https://www.biolegend.com/en-us/products/pe-cyanine7-anti-human-cd25-antibody-1909?GroupID=BLG7919</a>               |
| PE anti-human CD70 Antibody                   | 113-16       | BioLegend | 355104      | 1:50     | <a href="https://www.biolegend.com/en-us/products/pe-anti-human-cd70-antibody-8044?GroupID=BLG10960">https://www.biolegend.com/en-us/products/pe-anti-human-cd70-antibody-8044?GroupID=BLG10960</a>                               |
| FITC anti-human CD45 Antibody                 | HI30         | BioLegend | 304038      | 1:50     | <a href="https://www.biolegend.com/fr-ch/products/fitc-anti-human-cd45-antibody-707">https://www.biolegend.com/fr-ch/products/fitc-anti-human-cd45-antibody-707</a>                                                               |
| PE anti-human Granzyme A Antibody             | CB9          | BioLegend | 507206      | 1:20     | <a href="https://www.biolegend.com/en-us/products/pe-anti-human-granzyme-a-antibody-1539">https://www.biolegend.com/en-us/products/pe-anti-human-granzyme-a-antibody-1539</a>                                                     |
| PE anti-human Perforin Antibody               | B-D48        | BioLegend | 353304      | 1:20     | <a href="https://www.biolegend.com/en-us/products/pe-anti-human-perforin-antibody-7516?GroupID=BLG9616">https://www.biolegend.com/en-us/products/pe-anti-human-perforin-antibody-7516?GroupID=BLG9616</a>                         |
| APC anti-human CD279 (PD-1) Antibody          | A17188 B     | BioLegend | 621610      | 1:20     | <a href="https://www.biolegend.com/nl-be/products/apc-anti-human-cd279-pd-1-antibody-18920">https://www.biolegend.com/nl-be/products/apc-anti-human-cd279-pd-1-antibody-18920</a>                                                 |
| FITC anti-human CD274 (B7-H1, PD-L1) Antibody | MIH2         | BioLegend | 393605      | 1:20     | <a href="https://www.biolegend.com/en-us/products/fitc-anti-human-cd274-b7-h1-pd-l1-antibody-16037?GroupID=BLG9934">https://www.biolegend.com/en-us/products/fitc-anti-human-cd274-b7-h1-pd-l1-antibody-16037?GroupID=BLG9934</a> |

|                                                   |          |            |             |          |                                                                                                                                                                                                                         |
|---------------------------------------------------|----------|------------|-------------|----------|-------------------------------------------------------------------------------------------------------------------------------------------------------------------------------------------------------------------------|
| APC anti-human CD70 Antibody                      | 113-16   | BioLegend  | 355110      | 1:50     | <a href="https://www.biolegend.com/en-us/products/apc-anti-human-cd70-antibody-8852?GroupID=BLG10960">https://www.biolegend.com/en-us/products/apc-anti-human-cd70-antibody-8852?GroupID=BLG10960</a>                   |
| CD70 Monoclonal Antibody (FR70), PE, eBioscience™ | FR70     | Invitrogen | 12-0701-82  | 1:20     | <a href="https://www.thermofisher.com/antibody/product/CD70-Antibody-clone-FR70-Monoclonal/12-0701-82">https://www.thermofisher.com/antibody/product/CD70-Antibody-clone-FR70-Monoclonal/12-0701-82</a>                 |
| FITC anti-human/mouse/rat CD278 (ICOS) Antibody   | C398.4 A | BioLegend  | 313506      | 1:20     | <a href="https://www.biolegend.com/fr-ch/products/fitc-anti-human-mouse-rat-cd278-icos-antibody-2481">https://www.biolegend.com/fr-ch/products/fitc-anti-human-mouse-rat-cd278-icos-antibody-2481</a>                   |
| PE/Cyanine7 anti-human CD357 (GITR) Antibody      | 108-17   | BioLegend  | 371223      | 1:50     | <a href="https://www.biolegend.com/nl-be/search-results/pe-cyanine7-anti-human-cd357-gitr-antibody-14456">https://www.biolegend.com/nl-be/search-results/pe-cyanine7-anti-human-cd357-gitr-antibody-14456</a>           |
| Pacific Blue™ anti-human FOXP3 Antibody           | 206D     | BioLegend  | 320116      | 1:20     | <a href="https://www.biolegend.com/en-us/products/pacific-blue-anti-human-foxp3-antibody-3053?GroupID=BLG4131">https://www.biolegend.com/en-us/products/pacific-blue-anti-human-foxp3-antibody-3053?GroupID=BLG4131</a> |
| FITC anti-human CD64 Antibody                     | S18012 C | BioLegend  | 399506      | 1:50     | <a href="https://www.biolegend.com/nl-nl/products/fitc-anti-human-cd64-antibody-19189?GroupID=GROUP28">https://www.biolegend.com/nl-nl/products/fitc-anti-human-cd64-antibody-19189?GroupID=GROUP28</a>                 |
| APC anti-human CD138 (Syndecan-1) Antibody        | DL-101   | BioLegend  | 352308      | 1:50     | <a href="https://www.biolegend.com/en-us/search-results/apc-anti-human-cd138-syndecan-1-antibody-7315">https://www.biolegend.com/en-us/search-results/apc-anti-human-cd138-syndecan-1-antibody-7315</a>                 |
| PE anti-human CD45RA Antibody                     | HI100    | BioLegend  | 304107      | 1:50     | <a href="https://www.biolegend.com/en-us/products/pe-anti-human-cd45ra-antibody-687">https://www.biolegend.com/en-us/products/pe-anti-human-cd45ra-antibody-687</a>                                                     |
| PE anti-human CD366 (Tim-3) Antibody              | F38-2E2  | BioLegend  | 345006      | 1:20     | <a href="https://www.biolegend.com/en-us/products/pe-anti-human-cd366-tim-3-antibody-6121?GroupID=BLG9937">https://www.biolegend.com/en-us/products/pe-anti-human-cd366-tim-3-antibody-6121?GroupID=BLG9937</a>         |
| FITC anti-human CD4 Antibody                      | A161A 1  | BioLegend  | 357406      | 1:50     | <a href="https://www.biolegend.com/en-gb/products/fitc-anti-human-cd4-antibody-8738?GroupID=BLG11451">https://www.biolegend.com/en-gb/products/fitc-anti-human-cd4-antibody-8738?GroupID=BLG11451</a>                   |
| FITC anti-human CD8a Antibody                     | RPA-T8   | BioLegend  | 301006      | 1:50     | <a href="https://www.biolegend.com/fr-lu/products/fitc-anti-human-cd8a-antibody-834">https://www.biolegend.com/fr-lu/products/fitc-anti-human-cd8a-antibody-834</a>                                                     |
| APC anti-human CD8 Antibody                       | SK1      | BioLegend  | 344722      | 1:50     | <a href="https://www.biolegend.com/en-us/products/apc-anti-human-cd8-antibody-6531?GroupID=BLG10167">https://www.biolegend.com/en-us/products/apc-anti-human-cd8-antibody-6531?GroupID=BLG10167</a>                     |
| IHC/IF Antibody                                   | Clone    | Vendor     | Catalog No. | Dilution |                                                                                                                                                                                                                         |



|                                                                                         |              |            |            |        |                                                                                                                                                                                                                                                                                         |
|-----------------------------------------------------------------------------------------|--------------|------------|------------|--------|-----------------------------------------------------------------------------------------------------------------------------------------------------------------------------------------------------------------------------------------------------------------------------------------|
| CD70 Polyclonal Antibody                                                                | Polyclonal   | Invitrogen | PA5-102557 | 1:200  | <a href="https://www.thermofisher.com/antibody/product/CD70-Antibody-Polyclonal/PA5-102557">https://www.thermofisher.com/antibody/product/CD70-Antibody-Polyclonal/PA5-102557</a>                                                                                                       |
| Anti-FOXP3 Antibody                                                                     | mAbcam 22510 | Abcam      | ab22510    | 1:100  | <a href="https://www.abcam.com/products/primary-antibodies/foxp3-antibody-mabcam-22510-bsa-and-azide-free-ab188638.html">https://www.abcam.com/products/primary-antibodies/foxp3-antibody-mabcam-22510-bsa-and-azide-free-ab188638.html</a>                                             |
| Recombinant anti-CTLA4 Antibody                                                         | CAL49        | Abcam      | ab237712   | 1:500  | <a href="https://www.abcam.com/products/primary-antibodies/ctla4-antibody-cal49-ab237712.html">https://www.abcam.com/products/primary-antibodies/ctla4-antibody-cal49-ab237712.html</a>                                                                                                 |
| Goat anti-Mouse IgG (H+L) Cross-Adsorbed Secondary Antibody, Alexa Fluor™ 488           | Polyclonal   | Invitrogen | A-11001    | 1:2000 | <a href="https://www.thermofisher.com/antibody/product/Goat-anti-Mouse-IgG-H-L-Cross-Adsorbed-Secondary-Antibody-Polyclonal/A-11001">https://www.thermofisher.com/antibody/product/Goat-anti-Mouse-IgG-H-L-Cross-Adsorbed-Secondary-Antibody-Polyclonal/A-11001</a>                     |
| Donkey anti-Rabbit IgG (H+L) Highly Cross-Adsorbed Secondary Antibody, Alexa Fluor™ 555 | Polyclonal   | Invitrogen | A-31572    | 1:1000 | <a href="https://www.thermofisher.com/antibody/product/Donkey-anti-Rabbit-IgG-H-L-Highly-Cross-Adsorbed-Secondary-Antibody-Polyclonal/A-31572">https://www.thermofisher.com/antibody/product/Donkey-anti-Rabbit-IgG-H-L-Highly-Cross-Adsorbed-Secondary-Antibody-Polyclonal/A-31572</a> |

**Supplementary Table 6 shRNA sequences used in this study.**

| shRNA primers                   |                                                                |
|---------------------------------|----------------------------------------------------------------|
| Gene                            | Sequencing (5' - 3')                                           |
| <i>NFKB2</i> -<br>shRNA_forward | CcggGCTGCTAAATGCTGCTCAGAACTCGAGTTCTGAGC<br>AGCATTTAGCAGCTTTTTg |
| <i>NFKB2</i> -<br>shRNA_reverse | aattcaaaaaGCTGCTAAATGCTGCTCAGAACTCGAGTTCTG<br>AGCAGCATTTAGCAGC |

**References**

1. Liu, D., *et al.* Integrative molecular and clinical modeling of clinical outcomes to PD1 blockade in patients with metastatic melanoma. *Nat Med* **25**, 1916-1927 (2019).
2. Van Allen, E.M., *et al.* Genomic correlates of response to CTLA-4 blockade in metastatic melanoma. *Science* **350**, 207-211 (2015).
3. Sade-Feldman, M., *et al.* Defining T Cell States Associated with Response to Checkpoint Immunotherapy in Melanoma. *Cell* **175**, 998-1013 e1020 (2018).
