# Supplementary material for: Nasopharyngeal carcinoma cells promote regulatory T cell development and suppressive activity via CD70-CD27 interaction
Source: PubMed Central journal article supplement (PMC10079957; doi:10.1038/s41467-023-37614-6), 2023-04-06
Supplement: 41467_2023_37614_MOESM3_ESM.pdf [file 41467_2023_37614_MOESM3_ESM.pdf]

## **Description of Additional Supplementary Files**

**Supplementary Data 1:** Differentially-expressed genes in Treg subtypes.

**Supplementary Data 2:** Transcription factor activities in NPC and NPE cells.

**Supplementary Data 3:** Mass spectrometry data
